# Supplementary material
Source: PubMed Central journal article supplement (PMC4311129)
Supplement: supp_128.3.472_JCS153932.pdf [file supp_128.3.472_JCS153932.pdf]

# Supplementary figure 1

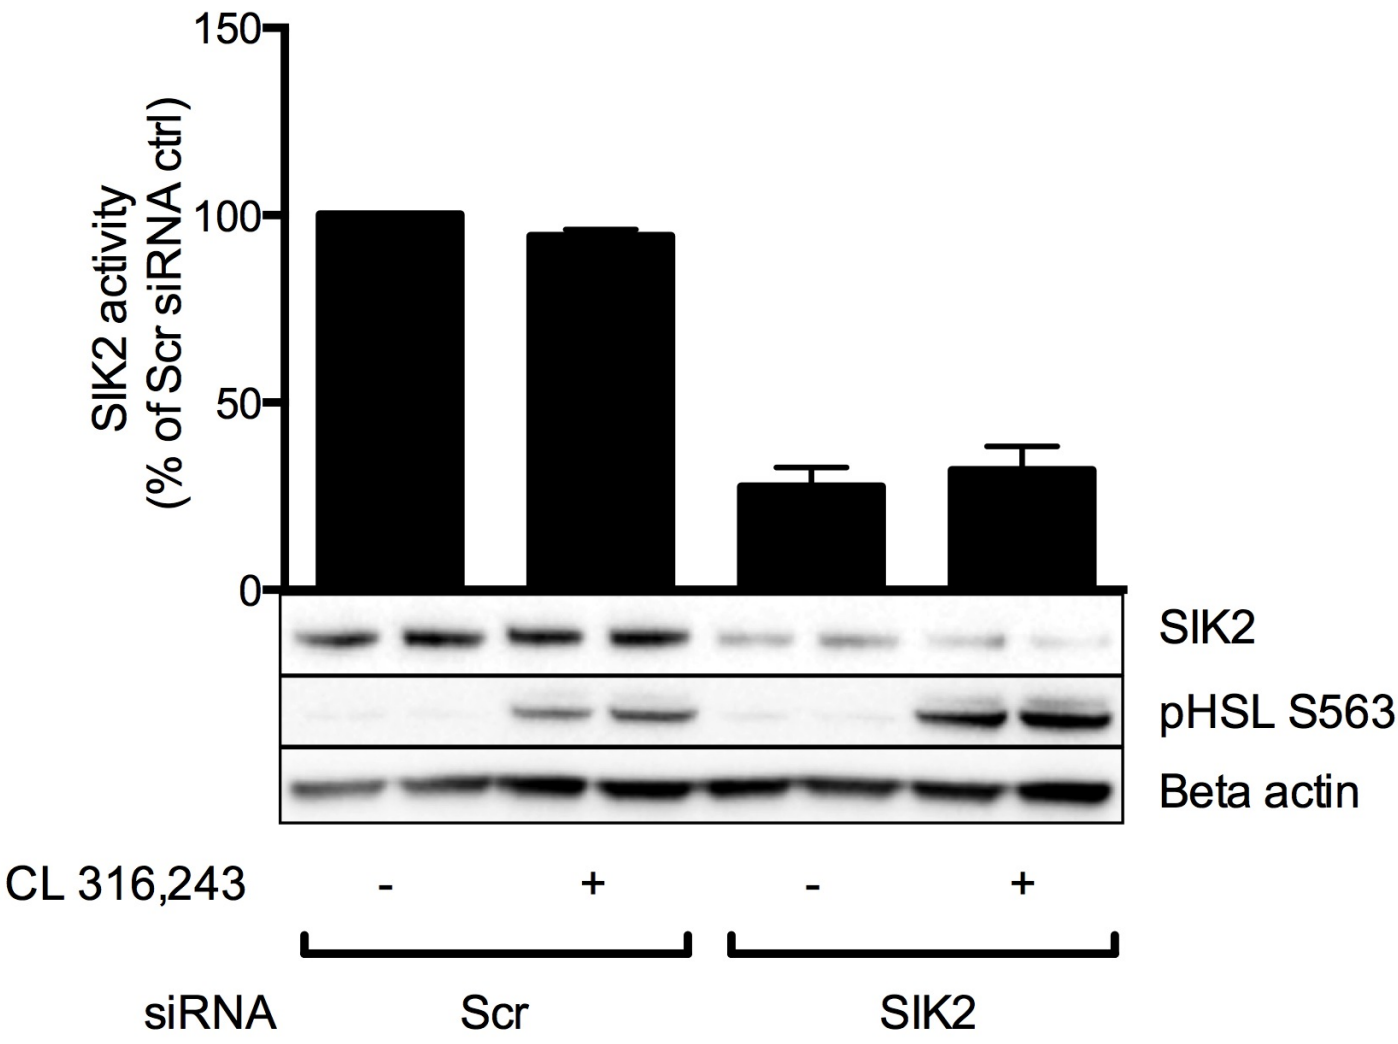

# Supplementary figure 2

**A**

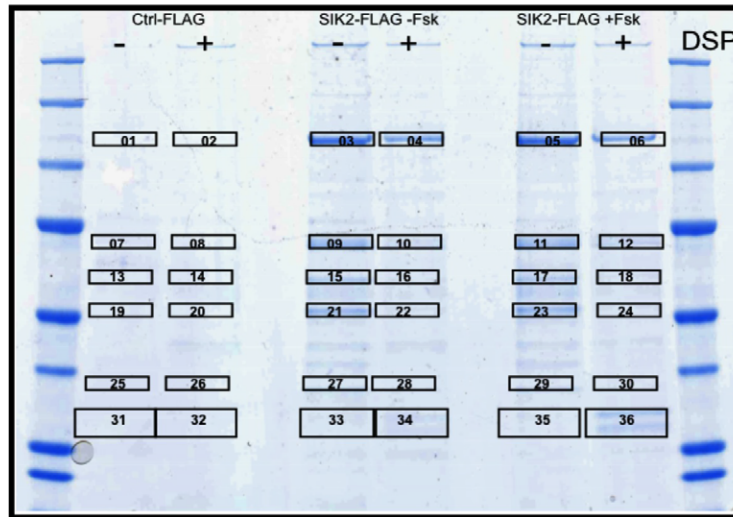

**B**

| Number of peptides identified | Sequence Coverage % | Band # and Protein identified | Protein Description   |
|-------------------------------|---------------------|-------------------------------|-----------------------|
|                               |                     | <b>15</b>                     |                       |
| 12                            | 23                  | sp P30153 2AAA_HUMAN          | PP2A 85KDa regA alpha |
| 8                             | 21                  | sp O75688 PPM1B_HUMAN         | PP1B                  |
| 2                             | 5                   | sp P63151 2ABA_HUMAN          | PP2A 55KDa regB alpha |
|                               |                     | <b>16</b>                     |                       |
| 4                             | 6                   | sp P30153 2AAA_HUMAN          | PP2A 85KDa regA alpha |
| 2                             | 5                   | sp O75688 PPM1B_HUMAN         | PP1B                  |
|                               |                     | <b>17</b>                     |                       |
| 8 (2) *                       | 24                  | sp O75688 PPM1B_HUMAN         | PP1B                  |
| 2 (2) *                       | 5                   | sp P35813 PPM1A_HUMAN         | PP1A                  |
| 10                            | 18                  | sp P30153 2AAA_HUMAN          | PP2A 85KDa regA alpha |
| 2                             | 5                   | sp P63151 2ABA_HUMAN          | PP2A 55KDa regB alpha |
|                               |                     | <b>18</b>                     |                       |
| 7                             | 19                  | sp O75688 PPM1B_HUMAN         | PP1B                  |
| 7                             | 13                  | sp P30153 2AAA_HUMAN          | PP2A 85KDa regA alpha |
|                               |                     | <b>21</b>                     |                       |
| 5 (2) *                       | 12                  | sp P63151 2ABA_HUMAN          | PP2A 55KDa regB alpha |
| 4 (2) *                       | 10                  | sp Q66LE6 2ABD_HUMAN          | PP2A 55KDa regB delta |
|                               |                     | <b>22</b>                     |                       |
| 2                             | 5                   | sp P63151 2ABA_HUMAN          | PP2A 55KDa regB alpha |
|                               |                     | <b>23</b>                     |                       |
| 5 (1) *                       | 13                  | sp P63151 2ABA_HUMAN          | PP2A 55KDa regB alpha |
| 2 (2) *                       | 6                   | sp Q66LE6 2ABD_HUMAN          | PP2A 55KDa regB delta |
|                               |                     | <b>24</b>                     |                       |
| 3                             | 6                   | sp P63151 2ABA_HUMAN          | PP2A 55KDa regB alpha |
|                               |                     | <b>27</b>                     |                       |
| 6                             | 22                  | sp P67775 PP2AA_HUMAN         | PP2A catalytic alpha  |
|                               |                     | <b>28</b>                     |                       |
|                               |                     | <b>29</b>                     |                       |
| 4 *                           | 17                  | sp P62714 PP2AB_HUMAN         | PP2A catalytic beta   |
| 4 *                           | 17                  | sp P67775 PP2AA_HUMAN         | PP2A catalytic alpha  |
|                               |                     | <b>30</b>                     |                       |
| 4 *                           | 17                  | sp P62714 PP2AB_HUMAN         | PP2A catalytic beta   |
| 4 *                           | 17                  | sp P67775 PP2AA_HUMAN         | PP2A catalytic alpha  |

## Supplementary figure 3

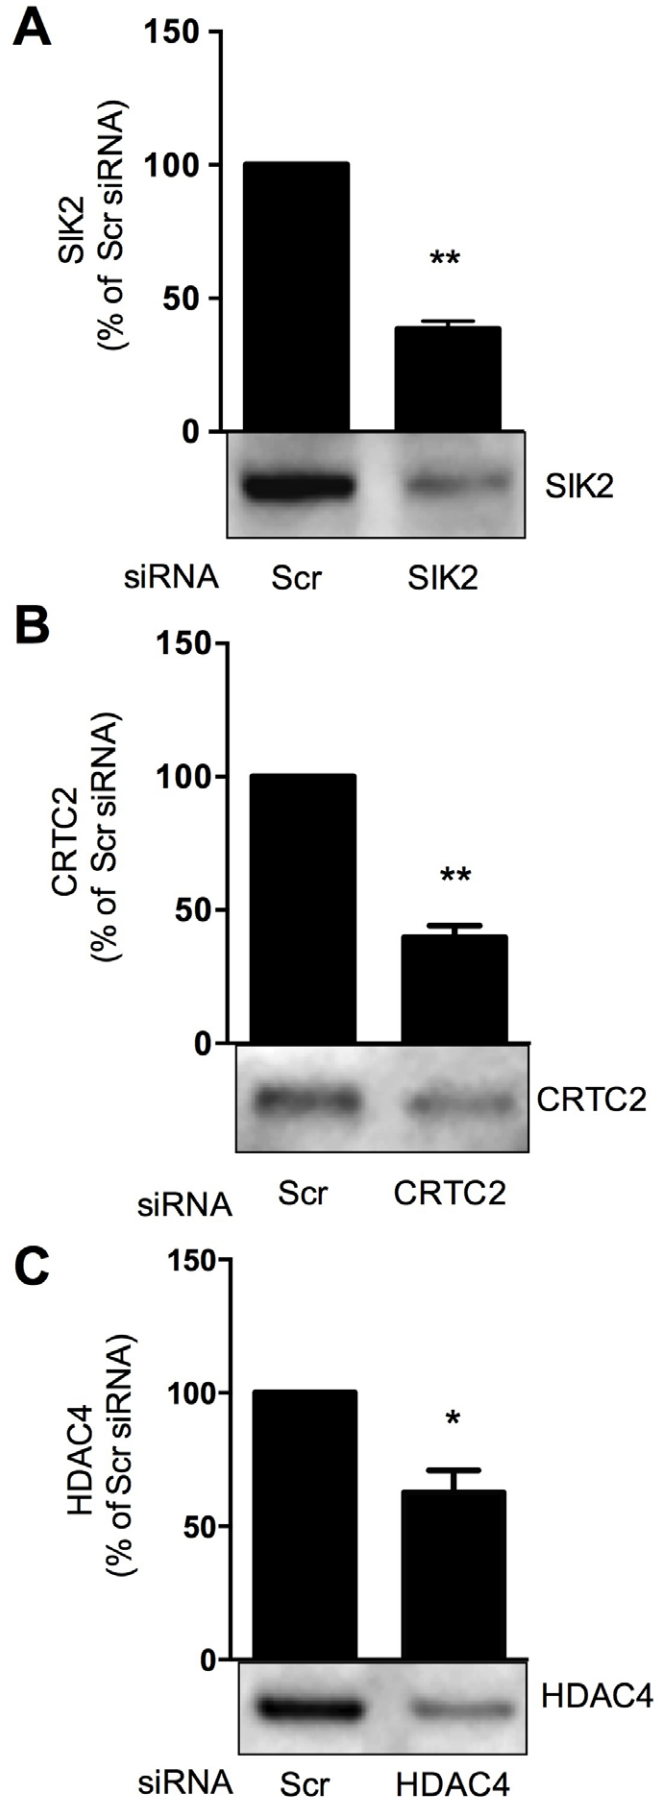

## Legends to Supplementary figures.

### Supplementary figure 1.

The activity of immunoprecipitated SIK2 was monitored by *in vitro* kinase activity measurement towards the peptide substrate HDAC5tide 72 h after electroporation of 3T3L1 adipocytes with siRNA, followed by stimulation with CL 316,243 (100 nM, 1 h). The phosphorylation of HSL on Ser563 was used as a positive control for the stimulation. Activity data are presented as the mean of 2 individual experiments  $\pm$  s.e.m.

### Supplementary figure 2. Identification of PP2A as an SIK2-interacting protein in FLAG-SIK2-expressing HEK293 cells.

**A.** FLAG-SIK2 expressed in HEK293 that were stimulated with or without forskolin (FSK, 100  $\mu$ M, 15 min) was purified with or without the crosslinker dithiobis succinimidyl propionate (DSP), and then subjected to electrophoresis and visualisation of co-immunoprecipitating proteins by colloidal Coomassie Blue. Sections were excised as shown and analysed by mass spectrometry. Bands 1-6 represent the bait (FLAG-SIK2), bands 7-12 are predominantly Hsp70 (data not shown) and bands 31-36 represent 14-3-3, which has earlier been shown to interact with SIK2 (Henriksson et al., 2012). **B.** Table listing information for peptides from PP2A and PP1A/B. For each excised band (15-18, 21-24, 27-30) the number of peptides identified for each protein and the total sequence coverage (as %) is given. Individual ion scores of identified peptides were all greater than the value required to indicate identity or extensive homology ( $p < 0.05$ ). Proteins are only listed where 2 or more peptides confirmed their presence. For adjacent sets of data with values marked by (\*), values in parentheses denote the number of peptides that are shared/non-unique and may thus represent either isoform. For bands 13, 14, 19, 20, 25 and 26, from cells transfected with the empty FLAG-vector, no subunits of PP2A or PP1A/B were identified (data not shown).

**Supplementary figure 3. Silencing of SIK2, CRTC2 and HDCA4 by siRNA in 3T3L1 adipocytes.** The expression of SIK2 (**A**), CRTC2 (**B**) and HDAC4 (**C**) was reduced by electroporation of siRNA into differentiated 3T3-L1 adipocytes, and protein levels were analysed by western blotting 72 h after electroporation. Bar graphs

represent the mean  $\pm$  s.e.m. of quantified western blot signals from 3-4 individual experiments, each in which the data was normalized to Scr-treated cells (100%).
